# Supplementary material
Source: PubMed Central journal article supplement (PMC5828172)
Supplement: NIHMS905125-supplement-1.pdf [file NIHMS905125-supplement-1.pdf]

## **Supplemental Information**

### **CTCF-mediated enhancer-promoter interaction is a critical regulator of cell-to-cell variation of gene expression**

Gang Ren, Wenfei Jin, Kairong Cui Joseph Rodriguez, Gangqing Hu, Daniel R. Larson and Keji Zhao

Figure S1

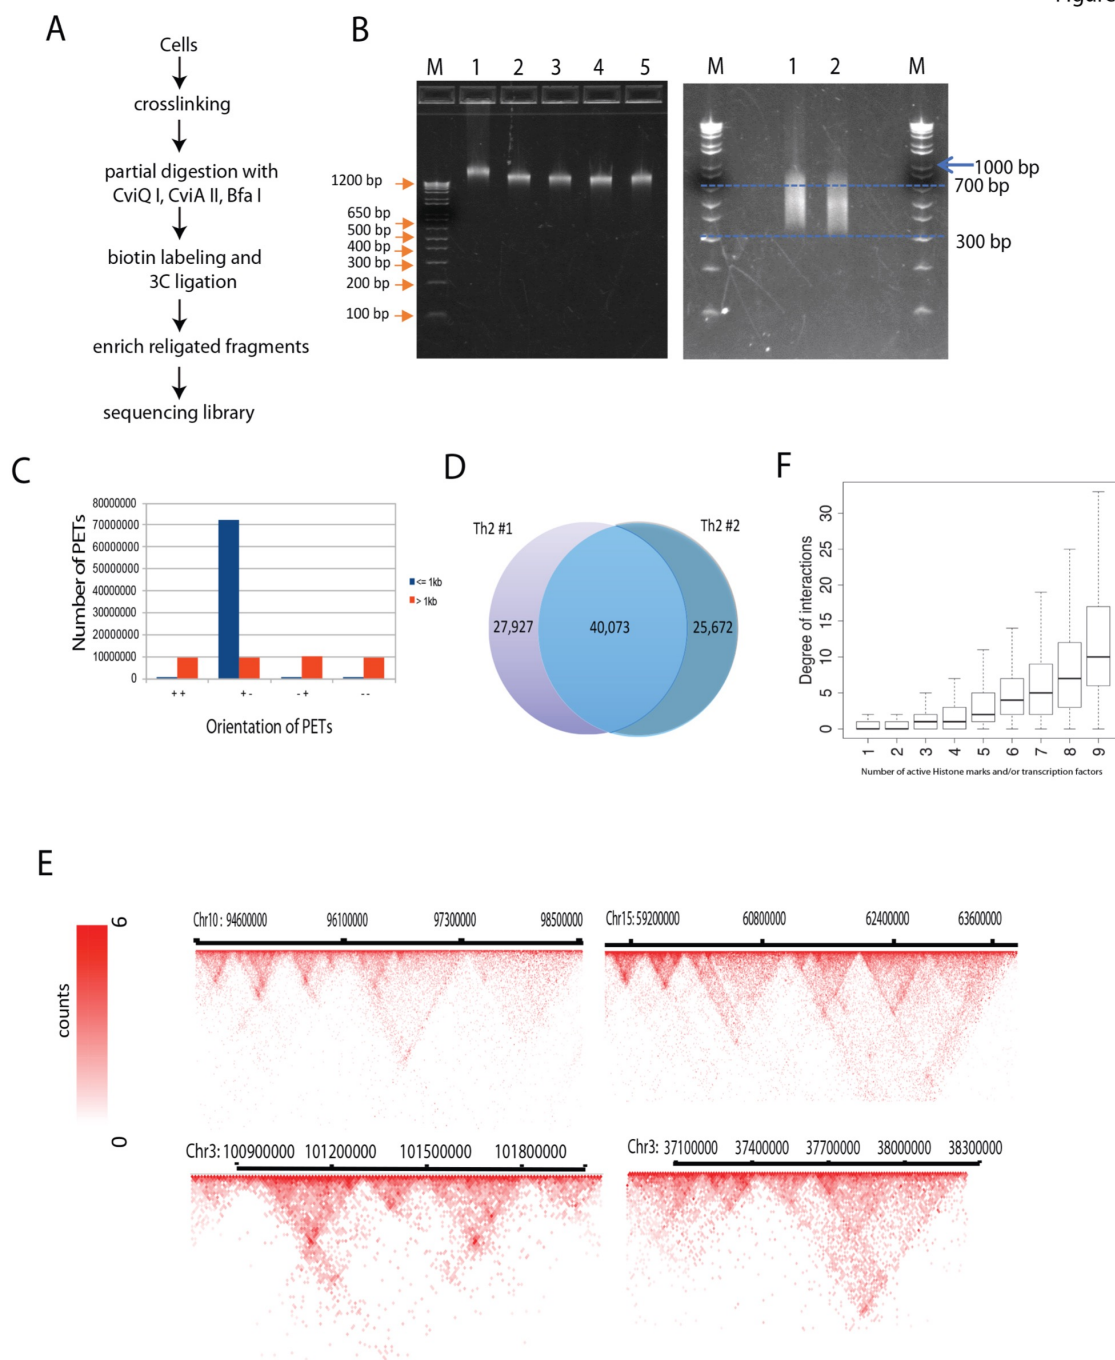

**Supplemental Figure S1. Related to Figure 1. Three enzyme Hi-C (3e Hi-C) is a reliable method to detect genome wide chromatin interaction.**

- A. Schema of 3e Hi-C method. Cross-linked cells were permeabilized and digested with a pool of three 4bp-cutters for 20 minutes. The DNA ends were labeled with biotin and purified for generation of sequencing libraries similar to Hi-C.
- B. Agarose gel images showing the sizes of DNA fragments after three enzymes digestion (left panel) and the size range of DNA fragments isolated for sequencing by NGS after library preparation (right panel, 300bp to 700bp).
- C. The orientation distribution of the pair end tags (PETs) from sequenced libraries (blue,  $\leq 1\text{kb}$ ; red,  $>1\text{kb}$ ).
- D. Venn diagram showing the Reproducibility of the promoter-enhancer interactions between two biological replicates in mouse Th2 cell.
- E. 3e Hi-C interaction frequencies displayed as two-dimensional heat maps for the Chromosome10: 94600000–98500000, Chr15: 59200000–63600000, Chr3:100900000–101800000, and Chr3: 37100000–38300000 regions.
- F. The degree of chromatin interaction at regulatory regions is correlated with the number of active histone modification marks and/or transcription factor binding. We examined the presence of 9 active marks and transcription factors (H3K27ac, H3K4me1, H3K4me2, H3K4me3, p300, Gata3, Stat6, CTCF and Cohesin) at each regulatory region and plotted the interaction density (Y-axis).

Figure S2

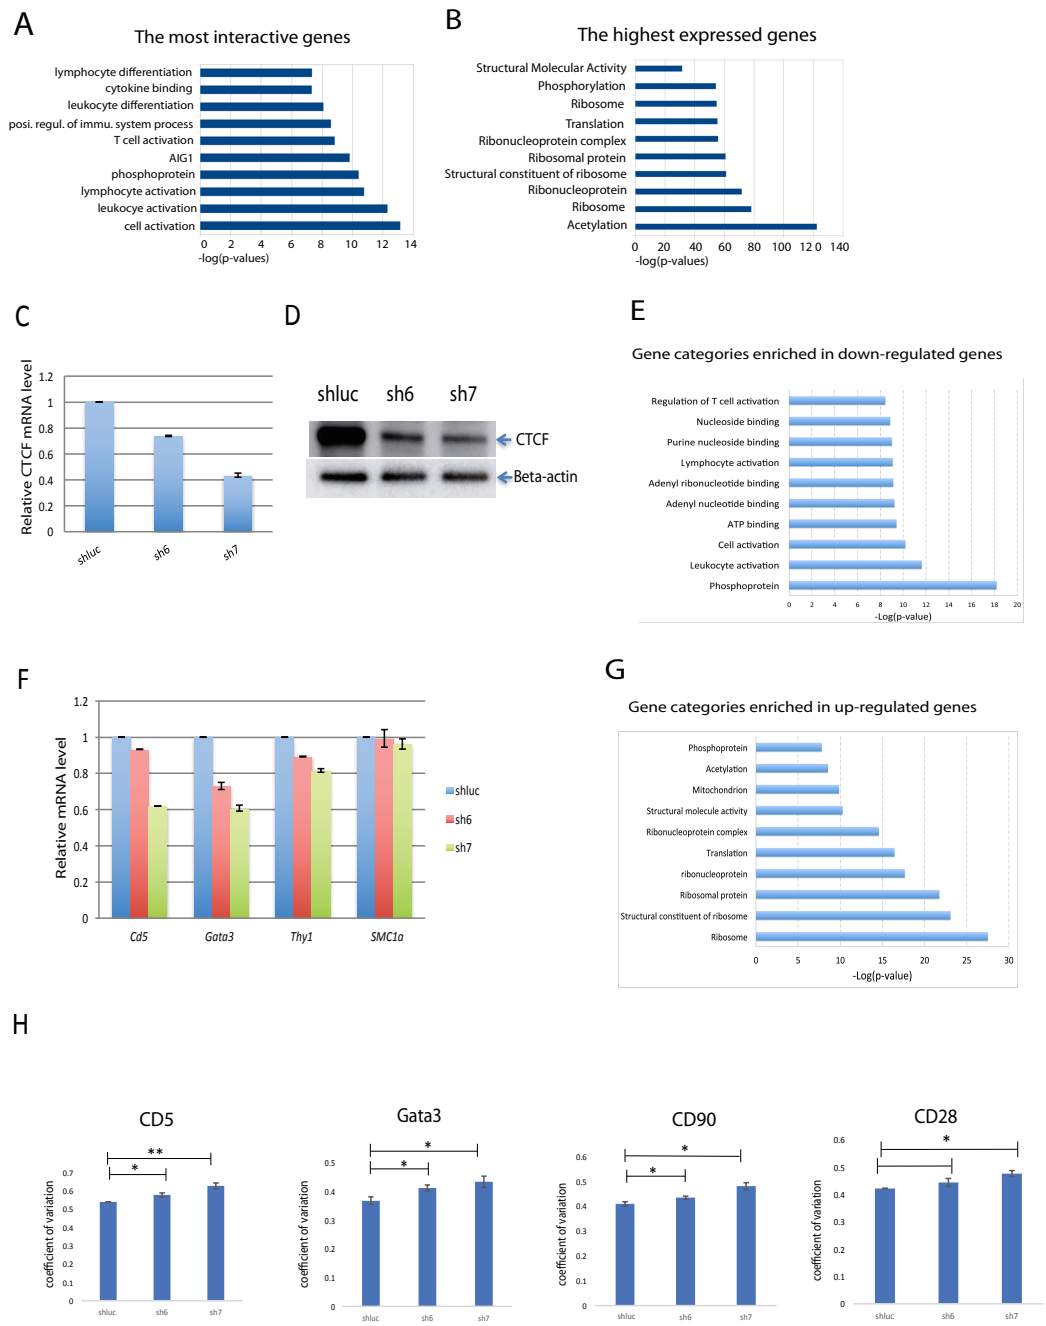

**Supplemental Figure S2. Related to Figure 2. Knockdown of CTCF results in decreased expression of some T lineage-specific genes and increased cell-to-cell variation of expression in mouse EL4 cells.**

- A. The genes with most long-distance chromatin interactions are highly enriched in immune functions. The gene ontology analysis was performed for 650 most interactive genes using DAVID. The top 10 enriched pathways and categories were plotted.
- B. The highest expressed genes are enriched in house-keeping functions. The gene ontology analysis was performed for 650 highest expressed genes using DAVID. The top 10 enriched pathways and categories were plotted.
- C. Quantitative real-time RT-PCR gene expression analysis of CTCF expression in control and knockdown (sh6, and sh7) EL4 cells. The EL4 cells were infected with retroviral particles encoding GFP and an shRNA targeting CTCF or a control sequence for 5 days. The GFP positive cells were sorted and analyzed for CTCF mRNA levels. The CTCF mRNA levels were normalized to GAPDH. Data shows average expression in two independent samples.
- D. Western blotting analysis of CTCF in EL4 cells infected with shRNA retroviral particles targeting CTCF (sh6 and sh7) or the luciferase gene (shLuc).
- E. Down-regulated genes are enriched in gene categories associated with T cell functions. RNA-Seq assays were performed to identify gene expression changes in the CTCF knockdown EL4 cells. Gene ontology analysis was performed using DAVID for down-regulated 819 genes.
- F. The *Cd5*, *Thy1*, *Gata3*, and *Cohesin (SMC1a)* mRNA expression levels were measured in CTCF knockdown and control cells by real-time RT-PCR. mRNA levels were normalized to GAPDH. Data show average expression of two independent experiments and are represented as mean  $\pm$  SEM.
- G. Up-regulated genes are enriched in gene categories associated with house-keeping functions. RNA-Seq assays were performed to identify gene expression changes in the CTCF knockdown EL4 cells. Gene ontology analysis was performed using DAVID for up-regulated 879 genes.
- H. Flow cytometry analysis revealed increased cell-to-cell variation of expression of CD5, Gata3, CD90 (encoded by *Thy1*) and CD28 in CTCF knockdown cells compared to the

control cells. Data show average of two independent experiments and are represented as mean  $\pm$  SEM. The P-values of difference between the KO and control cells are indicated above the columns. \*P<0.05, \*\*P<0.01.

Figure S3

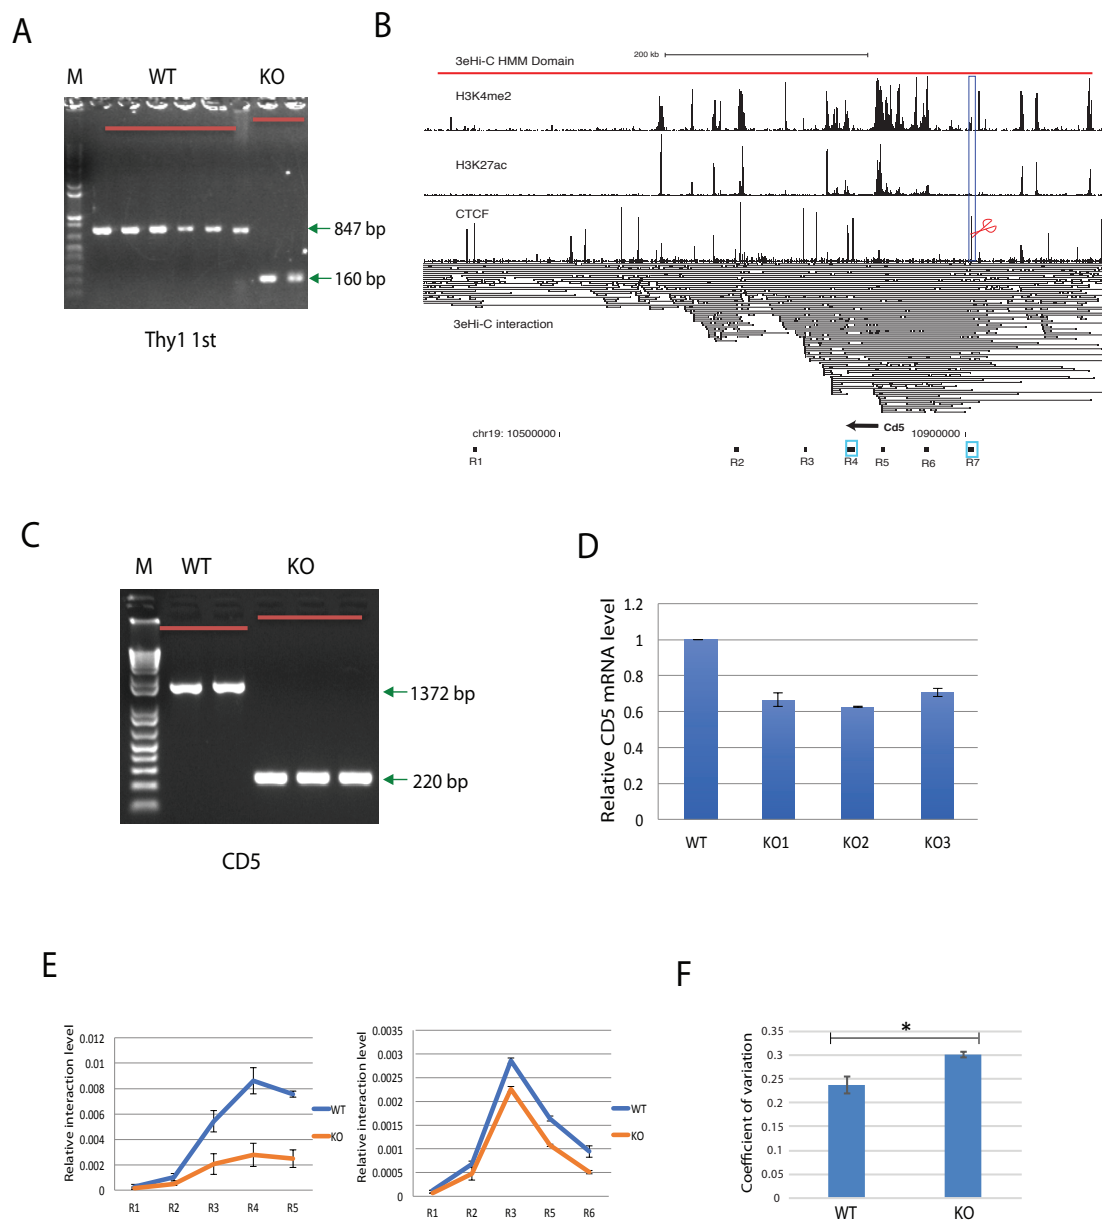

**Supplemental Figure S3. Related to Figure 3 and Figure 4. CTCF binding site at the *Cd5* gene locus contributes to the functional interaction between *Cd5* promoter with its enhancers and the expression noise control.**

- A. Genotyping of EL4 clones with deletion of the 1<sup>st</sup> CTCF binding site at the *Thy1* gene locus. PCR products of the expected sizes for both wild type and deletion clones are indicated on the right of the panel. Six wild type and two knockout clones are shown.
- B. Genome browser image showing the TAD domain, ChIP-Seq signals for H3K4me2, H3K27ac and CTCF (top panels) at the *Cd5* gene locus. The 3e Hi-C-detected interactions are displayed below the ChIP-Seq tracks. The deleted CTCF site is highlighted by a blue box and scissors. The regions (R1 to R7) examined by the 3C assays are indicated below the interaction map.
- C. Genotyping of EL4 clones with deletion of the CTCF binding site at the *Cd5* gene locus
- D. Deletion of the CTCF binding site decreases *Cd5* mRNA levels. Total RNAs isolated from the wild type or CTCF site deletion EL4 clones were analyzed by quantitative reverse-transcription PCR and normalized to GAPDH. Three CTCF binding site deletion clones were analyzed. Data are represented as mean  $\pm$  SEM. The CTCF site deletion compromised the enhancer-promoter interaction at the *Cd5* gene locus. The left panel shows the relative chromatin interaction intensity of the CTCF site with various enhancer regions indicated in panel B (R2 to R6 regions, R1 is a control region). The right panel shows the relative chromatin interaction intensity of the *Cd5* gene with various potential enhancer regions surrounding the gene. R7 is the anchor site for the left penal 3C analysis, R4 is the anchor site for the right penal 3C analysis.
- E. Deletion of the CTCF site results in increased cell-to-cell variation in the number of *Cd5* mRNAs per cell by single-molecule RNA-FISH assay. Data show average of two independent experiments and are represented as mean  $\pm$  SEM. The P-values of difference between the KO and control cells are indicated above the columns. \* $P < 0.05$ , \*\* $P < 0.01$ .

Figure S4

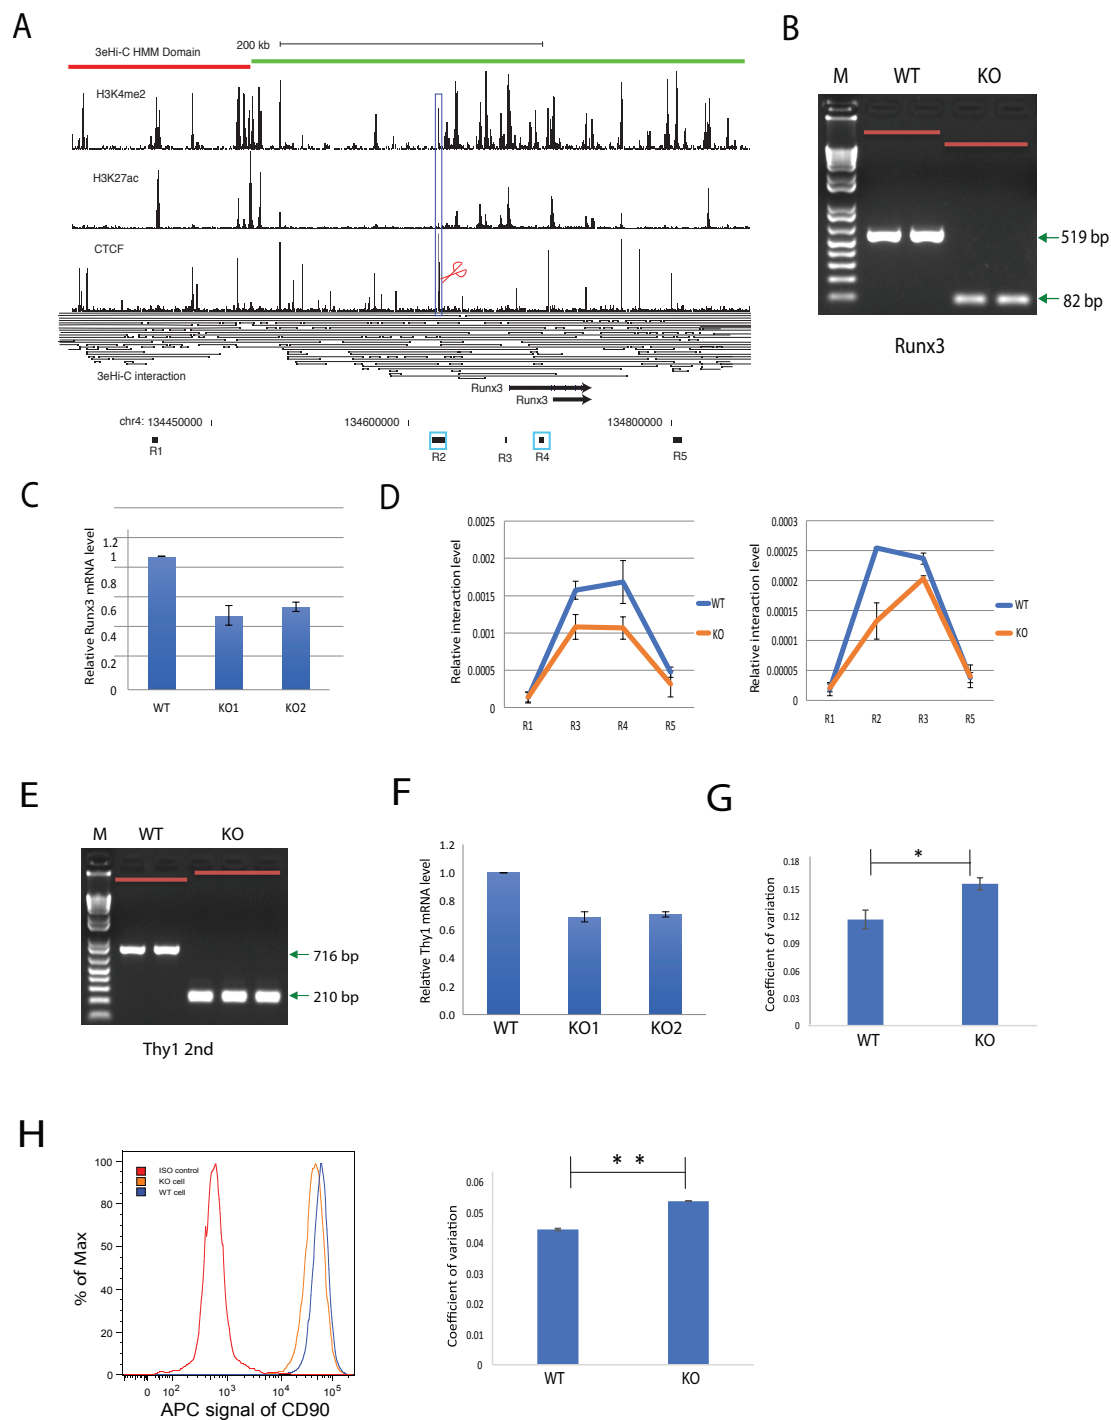

**Supplemental Figure S4. Related to Figure 3 and figure 4. CTCF binding sites at the *Runx3* and *Thy1* gene loci contribute to the functional interaction between promoters with their enhancers and noise control of gene expression.**

- A. Genome browser image showing the TAD domain, ChIP-Seq signals for H3K4me2, H3K27ac and CTCF (top panels) at the *Runx3* gene locus. The 3e Hi-C-detected interactions are displayed below the ChIP-Seq tracks. The deleted CTCF site is highlighted by a blue box and scissors. The regions (R1 to R5) examined by the 3C assays are indicated below the interaction map.
- B. Genotyping of EL4 clones with deletion of the CTCF binding site at the *Runx3* gene locus.
- C. Deletion of the CTCF binding site decreases *Runx3* mRNA levels. Total RNAs isolated from the wild type or CTCF site deletion EL4 clones were analyzed by quantitative reverse-transcription PCR and normalized to GAPDH. Two CTCF binding site deletion clones were analyzed. Data are represented as mean  $\pm$  SEM.
- D. The CTCF binding site deletion compromised the enhancer-promoter interaction at the *Runx3* gene locus. The left panel shows the relative chromatin interaction intensity of the CTCF site with various enhancer regions indicated in panel A (R2 to R5 regions, R1 is a control region). The right panel shows the relative chromatin interaction intensity of the *Runx3* gene promoter with various enhancer regions in this region. R2 is the anchor site for the left panel 3C analysis, R4 is the anchor site for the right panel 3C analysis. Data show average of two independent experiments and are represented as mean  $\pm$  SEM.
- E. Genotyping of EL4 clones with deletion of the 2<sup>nd</sup> CTCF binding site at the *Thy1* gene locus.
- F. Deletion of the 2<sup>nd</sup> CTCF binding site of the *Thy1* locus modestly decreases *Thy1* mRNA levels. Total RNAs isolated from the wild type or CTCF site deletion EL4 clones were analyzed by quantitative reverse-transcription PCR assays and normalized to GAPDH. Two KO clones were analyzed. Data are represented as mean  $\pm$  SEM.
- G. Deletion of the 2<sup>nd</sup> CTCF binding site of the *Thy1* locus leads to increased cell-to-cell variation in the number of *Thy1* mRNAs per cell by single-molecule RNA-FISH assay. Data show average of two independent experiments and are represented as mean  $\pm$  SEM.

The P-values of difference between the KO and control cells are indicated above the columns. \* $P < 0.05$ , \*\* $P < 0.01$ .

- H.** Deletion of the 2<sup>nd</sup> CTCF of the *Thy1* locus leads to increased cell-to-cell variation in the CD90 protein level. Left panels: Flow cytometry analysis shows the distribution of CD90 protein expression with the x-axis indicating the expression level and y-axis indicating the cell density. Right panel shows the increased coefficient of variation of CD90 in the 2<sup>nd</sup> CTCF binding site deletion cells as compared to the control cells. Data shows average of two independent experiments and are represented as mean  $\pm$  SEM.

**Supplemental Table S1. Related to Figure 1 and Figure 2.**

**Sheet 1:** Sequencing information of the 3e Hi-C libraries for Th2 cells

**Sheet 2:** Public datasets used in this study

**Sheet 3:** The highest expressed genes in mouse Th2 cells

**Sheet 4:** List of oligonucleotides used in this study

**Sheet 5:** The most interactive genes in mouse Th2 cells

**Sheet 6:** The down-regulated genes in CTCF knockdown EL4 cells

**Sheet 7:** The up-regulated genes in CTCF knockdown EL4 cells

**Supplemental Table S2. Related to Figure 3 and Figure 4.**

**Sheet 1 to 4:** The APC fluoresce single values of CD5, CD90, Gata3 and CD28 in each of wild type and CTCF knockdown EL4 cells as measured by FACS

**Sheet 5 and 6:** The APC fluoresce single values of CD90 in each of *Thy1* 1<sup>st</sup> site, *Thy1* 2<sup>nd</sup> site KO EL4 cells and wild type control cells as measured by FACS

**Sheet 7:** The probe sequences used for detecting *Thy1*, *Cd5* and CTCF mRNA molecules by single-molecule RNA-FISH assays

**Sheet 8, 9, and 10:** Number of *Thy1*, *Cd5* and CTCF mRNA molecules in each of wild type and the 1<sup>st</sup> CTCF binding site deletion, the 2<sup>nd</sup> CTCF binding site deletion, and the *Cd5* locus CTCF binding site deletion EL4 cells measured by RNA-FISH assays
